# Supplementary material for: Ultrasensitive version of nucleic acid sequence-based amplification (NASBA) utilizing a nicking and extension chain reaction system
Source: Royal Society of Chemistry journal article supplement (doi:10.1039/d1nr00564b), 2021-01-01
Supplement: d1nr00564b1.pdf [file d1nr00564b1.pdf]

Supporting Information for

# **Ultrasensitive version of nucleic acid sequence-based amplification (NASBA) utilizing nicking and extension chain reaction system**

Yong Ju<sup>a,‡</sup>, Hyo Yong Kim<sup>a,‡</sup>, Jun Ki Ahn<sup>a, b</sup>, and Hyun Gyu Park<sup>a\*</sup>

<sup>a</sup> Department of Chemical and Biomolecular Engineering (BK21+ Program), Korea Advanced Institute of Science and Technology (KAIST), 291 Daehak-ro, Yuseong-gu, Daejeon 34141, Republic of Korea

<sup>b</sup> Human Convergence Technology Group, Korea Institute of Industrial Technology (KITECH), 143 Hangeul-ro, Sangnok-gu, Ansan 15588, Republic of Korea

<sup>‡</sup> These authors equally contributed to this work.

<sup>\*</sup> To whom correspondence should be addressed.

E-mail: [hgpark@kaist.ac.kr](mailto:hgpark@kaist.ac.kr) (H.G. Park); Tel.: +82-42-350-3932; Fax: +82-42-350-3910.

**Table S1.** Oligonucleotide sequences employed in this study

| Oligonucleotide                            | Sequence (5'→3') <sup>(a)</sup>                                                                               |
|--------------------------------------------|---------------------------------------------------------------------------------------------------------------|
| <b>NASBA primer 1</b>                      | <b>AAT TCT <u>AAT ACG ACT CAC TAT AGG</u> GAC TAA</b><br>TGG TGC TAG TGA C                                    |
| <b>NASBA primer 2</b>                      | GTG ATT CAA CAA TGA CCA A                                                                                     |
| <b>NESBA primer 1 (NP1)</b>                | <b>AAA AAA AGG ATC GGG GAA TTC <u>TAA TAC GAC</u></b><br><b><u>TCA CTA TAG</u></b> GGA CTA ATG GTG CTA GTG AC |
| <b>NESBA primer 2 (NP2)</b>                | <b>AAA AAA AGG ATC GGG GGT</b> GAT TCA ACA ATG<br>ACC AA                                                      |
| <b>Molecular beacon (MB)<sup>(b)</sup></b> | FAM <sup>(1)</sup> -CTT GGA TTT GAT CTT AAT TCC AAG-<br>DABCYL <sup>(2)</sup>                                 |

(a) The underlined letters indicate the T7 RNA promoter sequence and the bold letters indicate the extended sequence of the primer. Green color represents the nicking site and blue color in MB represents the sequence binding to RNA amplicon.

(b) Abbreviations: (1) FAM: carboxyfluorescein, (2) DABCYL: 4-([4-(Dimethylamino)phenyl]azo)benzoic acid.

**Table S2.** Reaction conditions of different types of NE

| <b>NE</b>        | <b>Optimal temperature (°C)</b> | <b>Reaction buffer</b>                |
|------------------|---------------------------------|---------------------------------------|
| <b>Nt.AlwI</b>   | <b>37</b>                       | <b>NEbuffer™ 2.1<sup>(a)</sup></b>    |
| <b>Nt.BsmAI</b>  | <b>37</b>                       | <b>CutSmart™ Buffer<sup>(b)</sup></b> |
| <b>Nt.BstNBI</b> | <b>55</b>                       | <b>NEbuffer™ 3.1<sup>(c)</sup></b>    |
| <b>Nb.BsmI</b>   | <b>65</b>                       | <b>NEbuffer™ 3.1</b>                  |

(a) NEbuffer™ 2.1 (1X): 10 mM Tris-HCl, pH 7.9, 50 mM NaCl, 10 mM MgCl<sub>2</sub>, and 100 µg/ml BSA

(b) CutSmart™ Buffer (1X): 20 mM Tris-acetate, pH 7.9, 50 mM Potassium acetate, 10 mM Magnesium acetate, and 100 µg/ml Recombinant Albumin

(c) NEbuffer™ 3.1 (1X): 50 mM Tris-HCl, pH 7.9, 100 mM NaCl, 10 mM MgCl<sub>2</sub>, and 100 µg/ml Recombinant Albumin

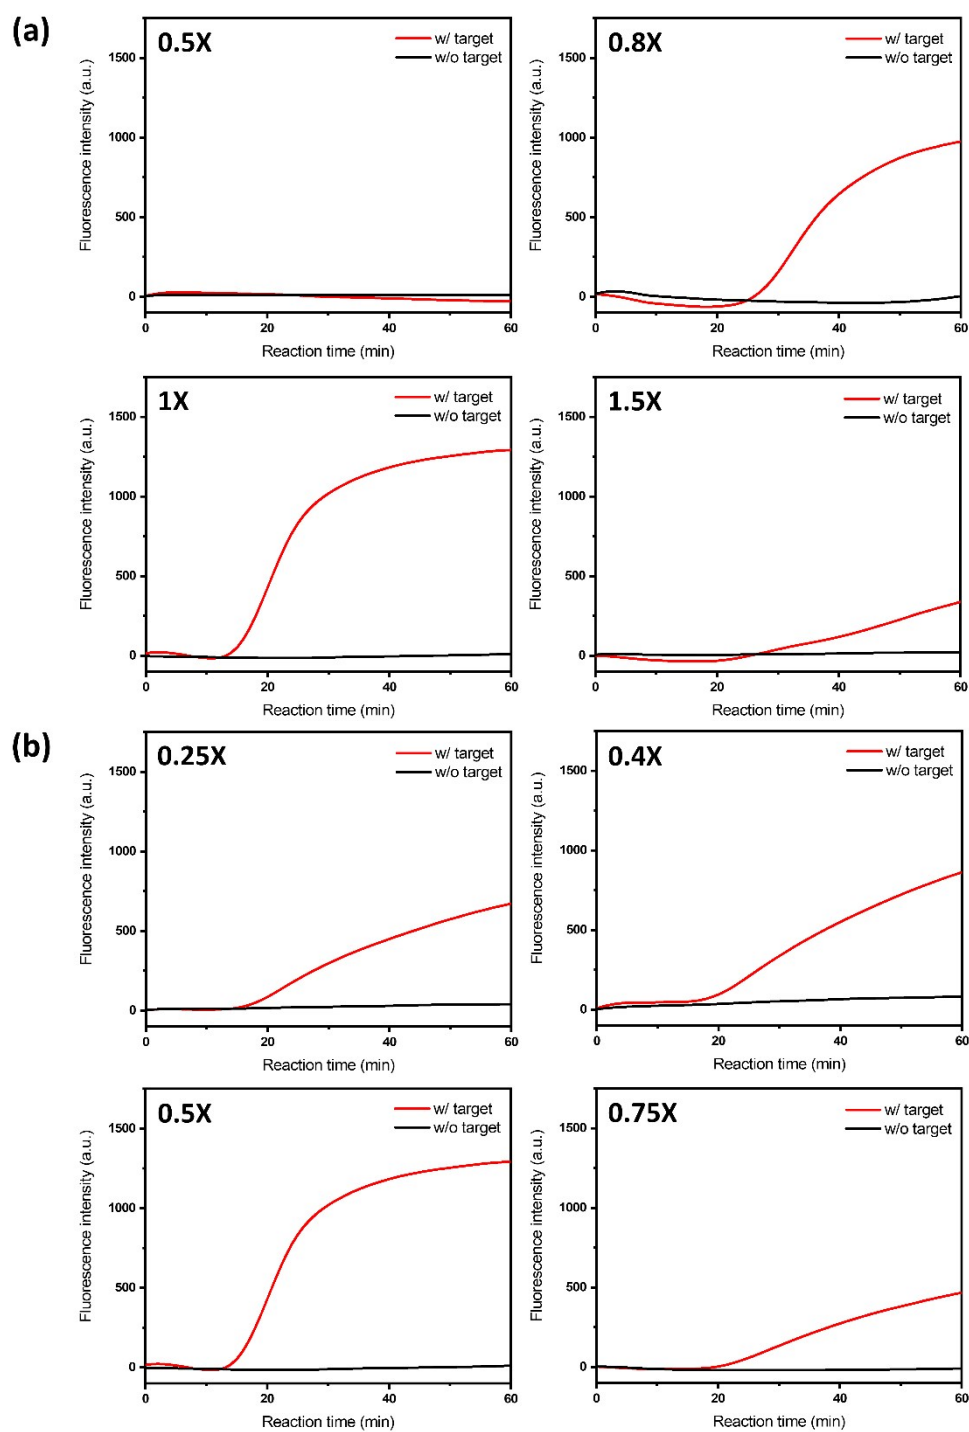

**Fig. S1.** Optimization of NASBA reaction buffer and NEBuffer™ 2.1. Time-dependent fluorescent signals produced from MB during the NESBA reaction containing (a) NASBA reaction buffer and (b) NEBuffer™ 2.1 at varying concentrations in the presence (Red) and

absence of target gRNA (Black). The final concentrations of NASBA enzyme cocktail, NE, and a NESBA primer set are 1×, 0.25 U/μL, and 0.7 μM each, respectively.

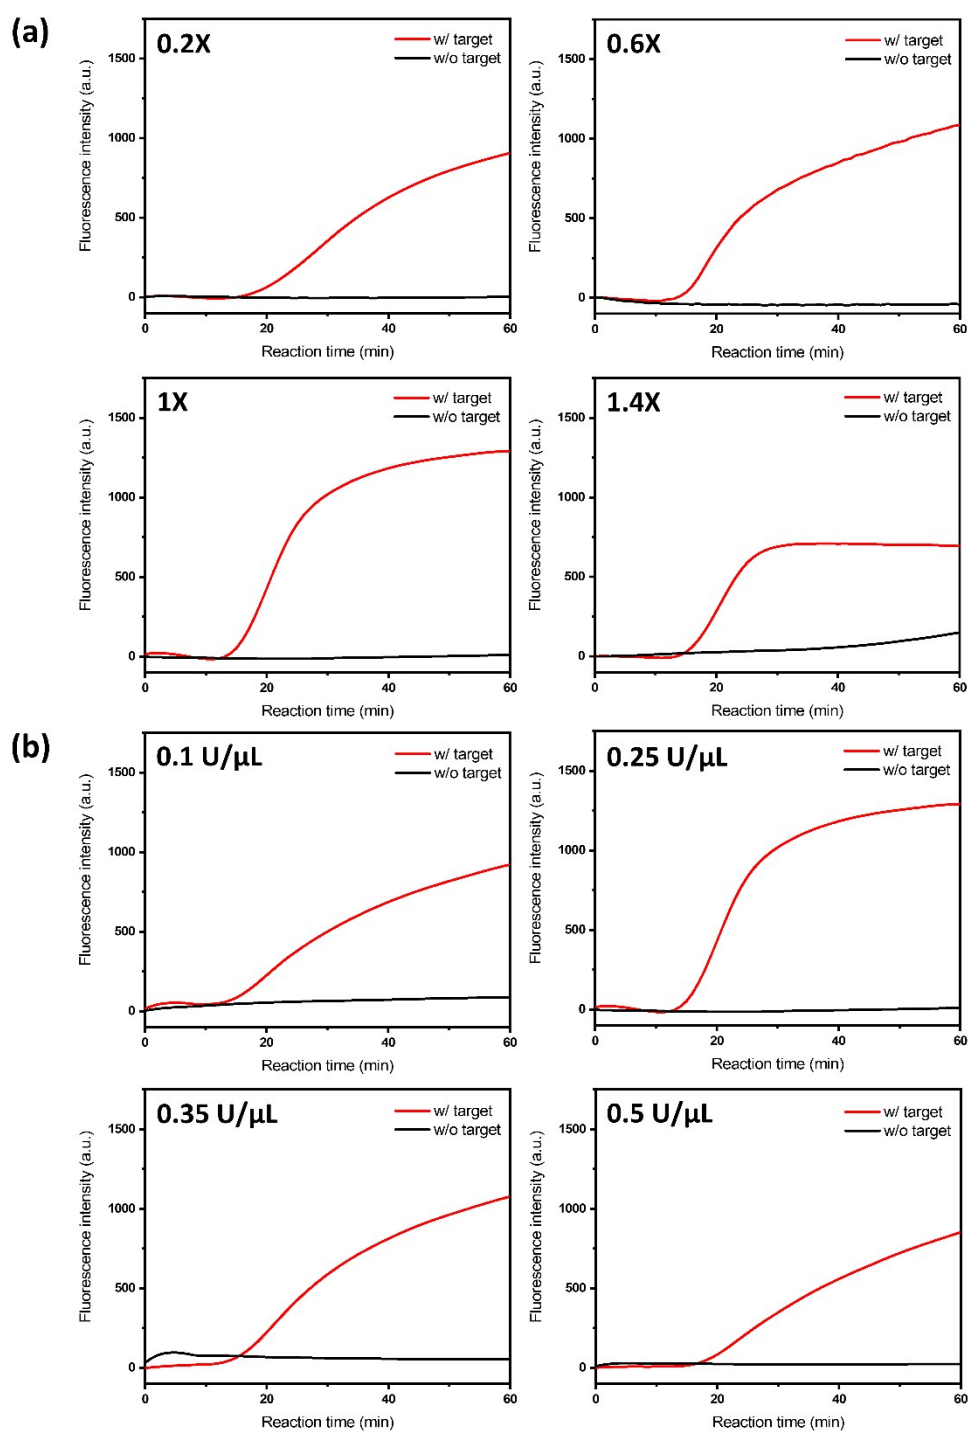

**Fig. S2.** Optimization of the NASBA enzyme cocktail and NE concentrations. Time-dependent fluorescent signals produced from MB during the NESBA reaction containing (a) NASBA enzyme cocktail and (b) NE at varying concentrations in the presence (Red) and absence of

target gRNA (Black). The final concentrations of NASBA reaction buffer, NEBuffer™ 2.1, and a NESBA primer set are 1×, 0.5×, and 0.7 μM each, respectively.

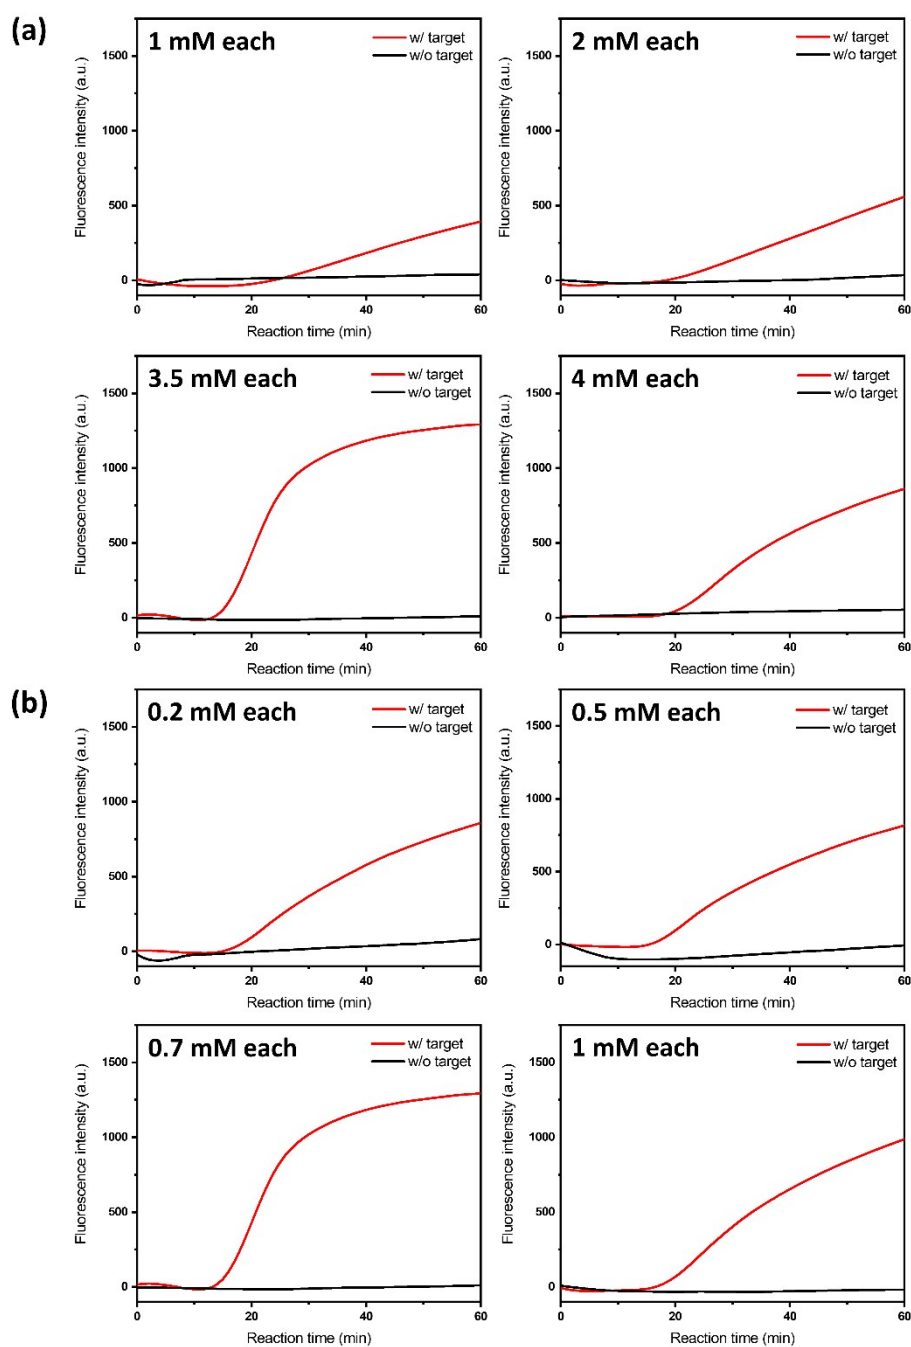

**Fig. S3.** Optimization of the rNTP and dNTP concentrations. Time-dependent fluorescent signals produced from MB during the NESBA reaction containing (a) rNTP and (b) dNTP at varying concentrations in the presence (Red) and absence of target gRNA (Black). The final



concentrations of NASBA reaction buffer, NEBuffer™ 2.1, NASBA enzyme cocktail, NE, and a NESBA primer set are 1×, 0.5×, 1×, 0.25 U/μL, and 0.7 μM each, respectively.

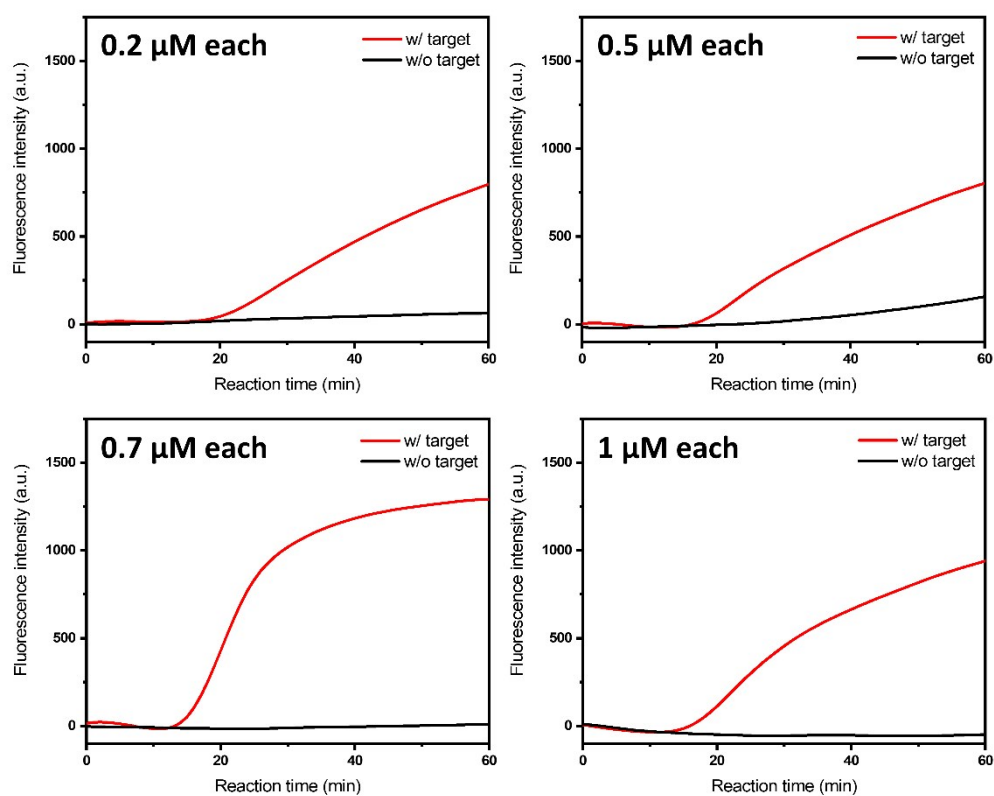

**Fig. S4.** Optimization of NESBA primer set concentration. Time-dependent fluorescent signals produced from MB during the NESBA reaction containing a NESBA primer set at varying concentrations in the presence (Red) and absence of target gRNA (Black). The final concentrations of NASBA reaction buffer, NEBuffer™ 2.1, NASBA enzyme cocktail, and NE are 1×, 0.5×, 1×, and 0.25 U/μL, respectively.

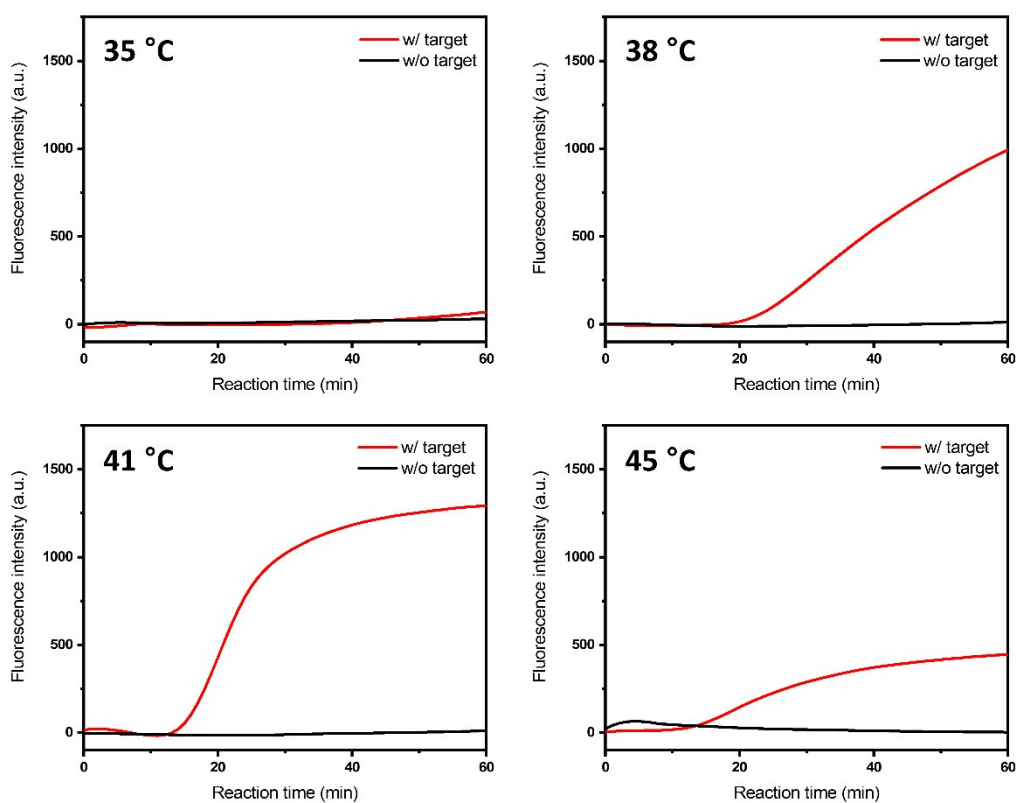

**Fig. S5.** Optimization of the reaction temperature. Time-dependent fluorescent signals produced from MB during the NESBA reaction in the presence (Red) and absence of target gRNA (Black) at various reaction temperatures. The final concentrations of NASBA reaction buffer, NEBuffer™ 2.1, NASBA enzyme cocktail, NE, and a NESBA primer set are 1×, 0.5×, 1×, 0.25 U/μL, and 0.7 μM each, respectively.

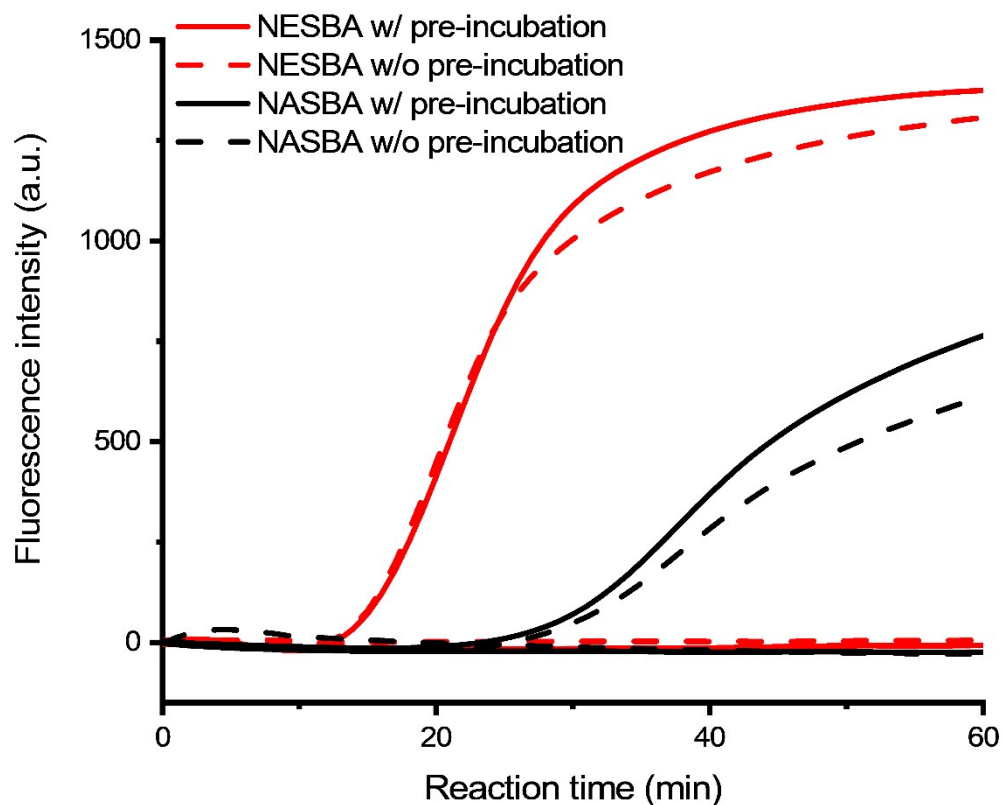

**Fig. S6.** The amplification efficiency of the NESBA and NASBA reactions with and without the initial denaturation step. Time-dependent fluorescent signals were produced from MB during the NESBA (red) and NASBA (black) reactions with (solid line) and without the initial denaturation step (dashed line). The final concentrations of NASBA reaction buffer, NEBuffer™ 2.1, NASBA enzyme cocktail, NE, and a NESBA/NASBA primer set are 1×, 0.5×, 1×, 0.25 U/μL, and 0.7 μM each, respectively.

## Reference

C. Qian, R. Wang, H. Wu, F. Ji and J. Wu, *Anal. Chim. Acta*, 2019, **1050**, 1.
